# Supplementary material for: Photodynamic Inactivation of Bovine Coronavirus with the Photosensitizer Toluidine Blue O
Source: MDPI journal article supplement (doi:10.3390/v16010048), 2023-12-27
Supplement: s1 [file s1]

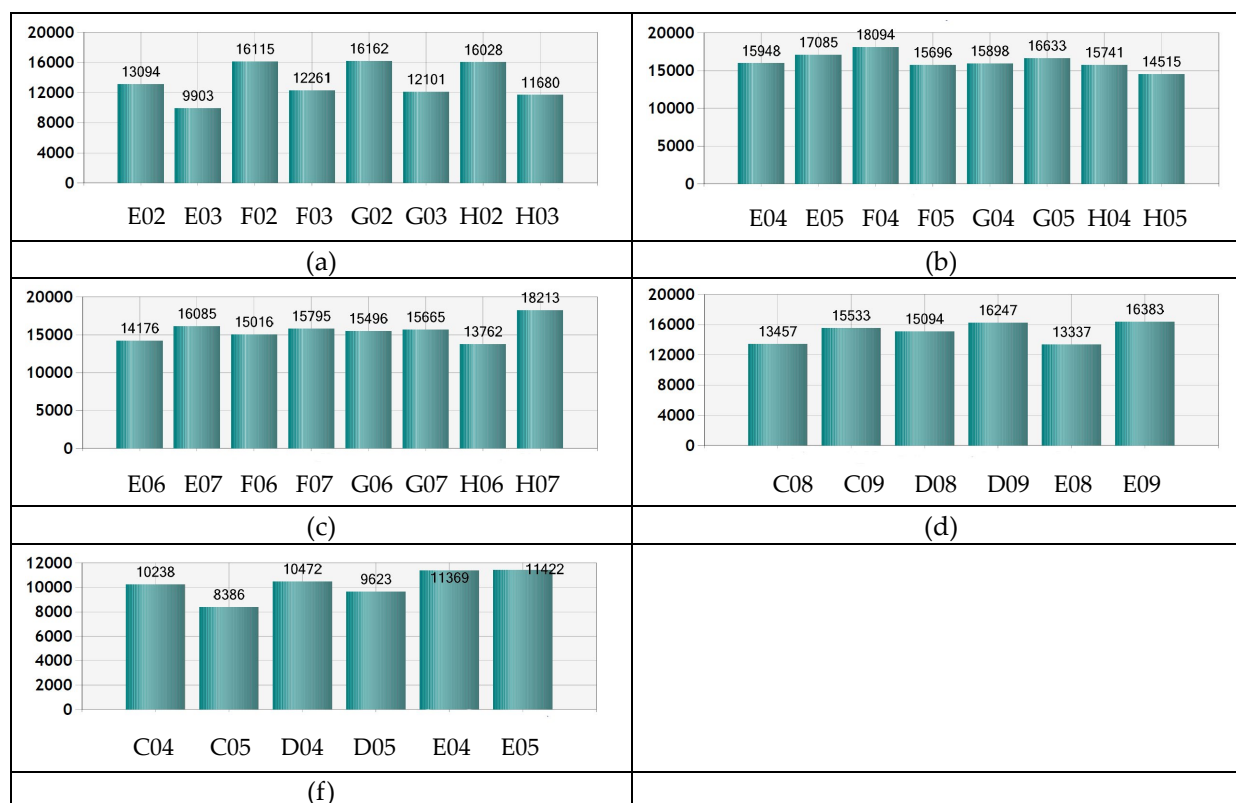

**Supplementary Figure S1.** Total events in the samples tested with ddPCR. Legend: (a) Cells with BCoV (virus control) – E02, E03 = dilution  $10^{-4}$ ; F02, F03 = dilution  $10^{-5}$ ; G02, G03 = dilution  $10^{-6}$ ; H02, H03 = non template control (PCR water); (b) TBO 0.005  $\mu\text{M}$  – E04, E05 = dilution  $10^{-3}$ ; F04, F05 = dilution  $10^{-4}$ ; G04, G05 = dilution  $10^{-5}$ ; H04, H05 = negative control from the RNA isolation; (c) TBO 0.02  $\mu\text{M}$  – E06, E07 = dilution  $10^{-2}$ ; F06, F07 = dilution  $10^{-3}$ ; G06, G07 = dilution  $10^{-4}$ ; H06, H07 = control with untreated cells without BCoV; (d) TBO 0.15  $\mu\text{M}$  – C08, C09 = no dilution; D08, D09 = dilution  $10^{-1}$ ; E08, E09 = dilution  $10^{-2}$ ; (e) TBO 0.3  $\mu\text{M}$  – C04, C05 no dilution; D04, D05 = dilution  $10^{-1}$ ; E04, E05 = dilution  $10^{-2}$ .

**Supplementary Table S1.** Concentrations of BCoV particles in the tested samples according to the ddPCR analysis – raw data of each repetition.

| BCoV cDNA concentration/reaction* for each repetition |                    |           |                         |           |                        |           |                        |                       |
|-------------------------------------------------------|--------------------|-----------|-------------------------|-----------|------------------------|-----------|------------------------|-----------------------|
| Dilution                                              | Virus control      | Dilution  | TBO 0.005 $\mu\text{M}$ | Dilution  | TBO 0.02 $\mu\text{M}$ | Dilution  | TBO 0.15 $\mu\text{M}$ | TBO 0.3 $\mu\text{M}$ |
| $10^{-4}$                                             | $9.30 \times 10^3$ | $10^{-3}$ | $3.54 \times 10^3$      | $10^{-2}$ | $9.70 \times 10^2$     | -         | $4.10 \times 10^2$     | $2.2 \times 10^1$     |
|                                                       | $9.64 \times 10^3$ |           | $3.36 \times 10^3$      |           | $8.74 \times 10^2$     |           | $4.52 \times 10^2$     | $6.8 \times 10^0$     |
| $10^{-5}$                                             | $8.72 \times 10^2$ | $10^{-4}$ | $8.72 \times 10^2$      | $10^{-3}$ | $9.8 \times 10^1$      | $10^{-1}$ | $6.0 \times 10^1$      | $4.8 \times 10^0$     |
|                                                       | $9.16 \times 10^2$ |           | $9.16 \times 10^2$      |           | $8.0 \times 10^1$      |           | $4.4 \times 10^1$      | $0.0 \times 10^0$     |
| $10^{-6}$                                             | $8.6 \times 10^1$  | $10^{-5}$ | $8.6 \times 10^1$       | $10^{-4}$ | $1.06 \times 10^1$     | $10^{-2}$ | $1.06 \times 10^1$     | $2.0 \times 10^0$     |
|                                                       | $1.06 \times 10^2$ |           | $1.06 \times 10^2$      |           | $3 \times 10^0$        |           | $5.8 \times 10^0$      | $0.0 \times 10^0$     |

Legend: \* - the volume of the ddPCR reaction is 20  $\mu\text{L}$ ; TBO – toluidine blue O.
